# Supplementary material
Source: PubMed Central journal article supplement (PMC4294239)
Supplement: IAI.02789-14_zii999091067so1.pdf [file IAI.02789-14_zii999091067so1.pdf]

## 1 **Supplemental Information Legends**

2 **Figure S1. Abrogation of kidney damage in *Sts*-deficient mice.** (A) Representative wild type  
3 and *Sts-1/2<sup>-/-</sup>* kidneys indicate no apparent morphological differences between kidneys derived from  
4 the two separate strains. (B) Representative histological analysis of wild type and *Sts-1/2<sup>-/-</sup>* kidneys  
5 (20X), either uninfected (top) or 6 days after infection with a dose of  $2.5 \times 10^5$  CFUs (bottom),  
6 stained with H&E. Kidneys harvested from uninfected wild type and *Sts-1/2<sup>-/-</sup>* mice were similar in  
7 appearance. Inflammatory foci and large misshapen tubules are evident in the kidney isolated from  
8 Day 6-infected wild-type mice but not in *Sts-1/2<sup>-/-</sup>* mice.

9

10 **Figure S2. Loss of *Sts*-1 and -2 promotes clearance of kidney fungal CFUs.** Mice infected with  
11  $2.5 \times 10^5$  *C. albicans* CFUs were monitored for 28 days. Right kidneys were harvested either from  
12 moribund mice (red) or mice that survived to day 28 (blue) and kidney fungal CFUs were assessed.  
13 Results are from two independent experiments with 9-10 total mice per group. For the moribund  
14 mice at the  $2.5 \times 10^5$  CFU/mouse dose,  $p < 0.01$  by Mann-Whitney analysis.

15

16 **Figure S3. Attenuated leukocyte response in the absence of *Sts*-1 and -2.** Inflammatory foci  
17 formed within the kidney cortex, visualized by H&E staining of histological sections of kidneys  
18 harvested 2 days after infection with  $2.5 \times 10^5$  CFUs (400X).

19

20 **Figure S4. Levels of kidney cytokines, WT and *Sts-1/2<sup>-/-</sup>*.** Levels of kidney cytokines were  
21 determined by multiplex analysis. Scatter plots display the results of one of two independent

22 experiments with similar results, each with 6 mice per group. \* denotes  $p < 0.05$  by Mann-Whitney  
23 analysis.
