# Supplementary material
Source: PubMed Central journal article supplement (PMC4294239)

Figure S1

**A.**

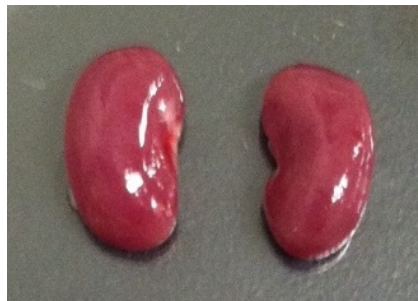

WT

*Sts-1/2<sup>-/-</sup>*

**B.**

WT

*Sts-1/2<sup>-/-</sup>*

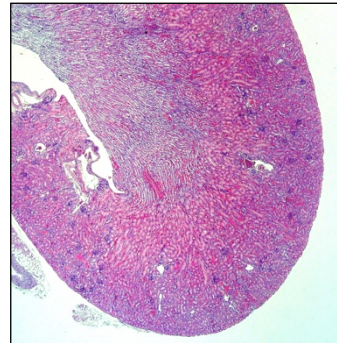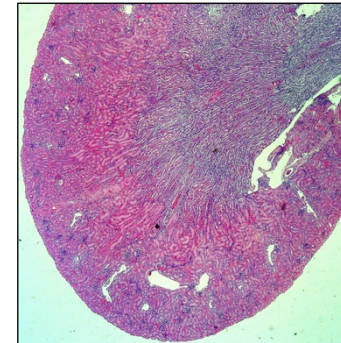

Uninfected

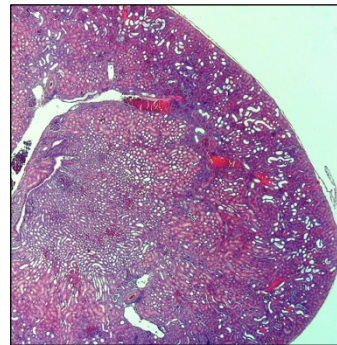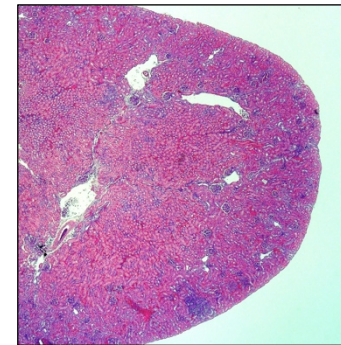

Day 6

20X

Figure S2

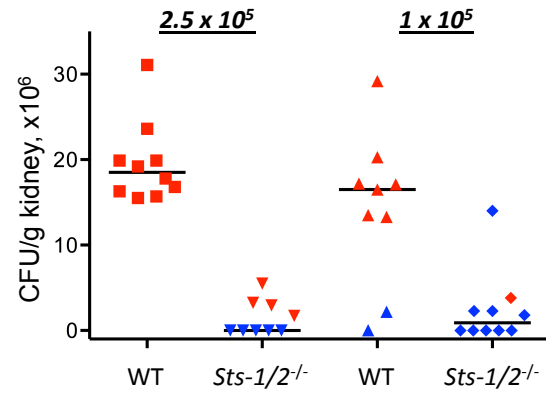

Figure S3

WT

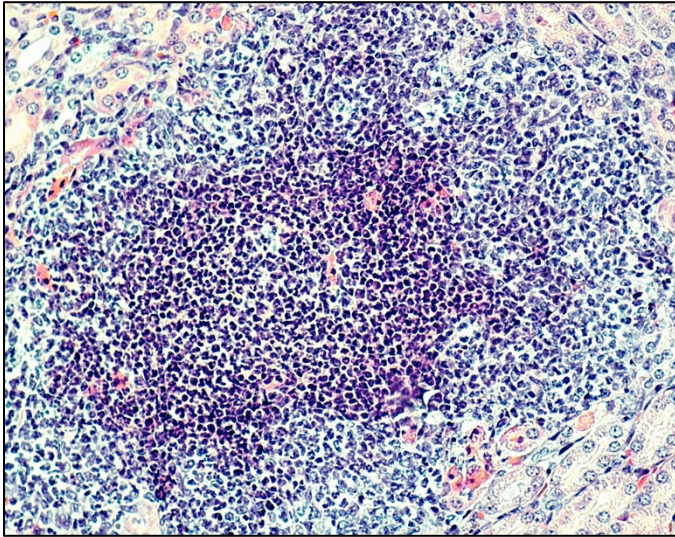

*Sts-1/2*<sup>-/-</sup>

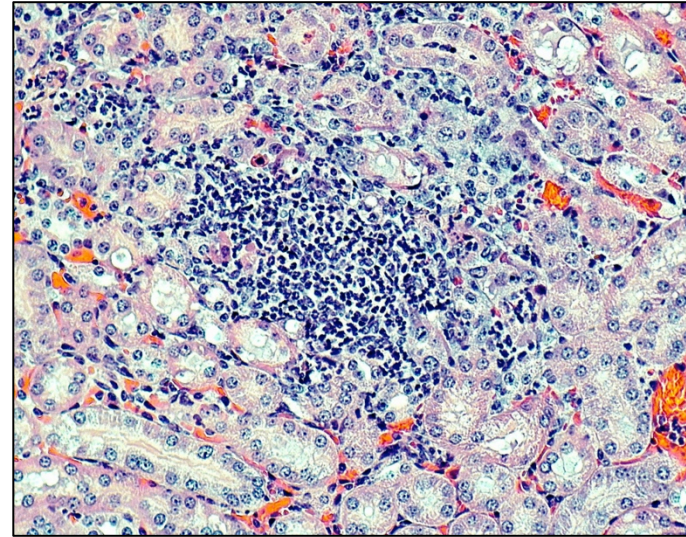

Figure S4

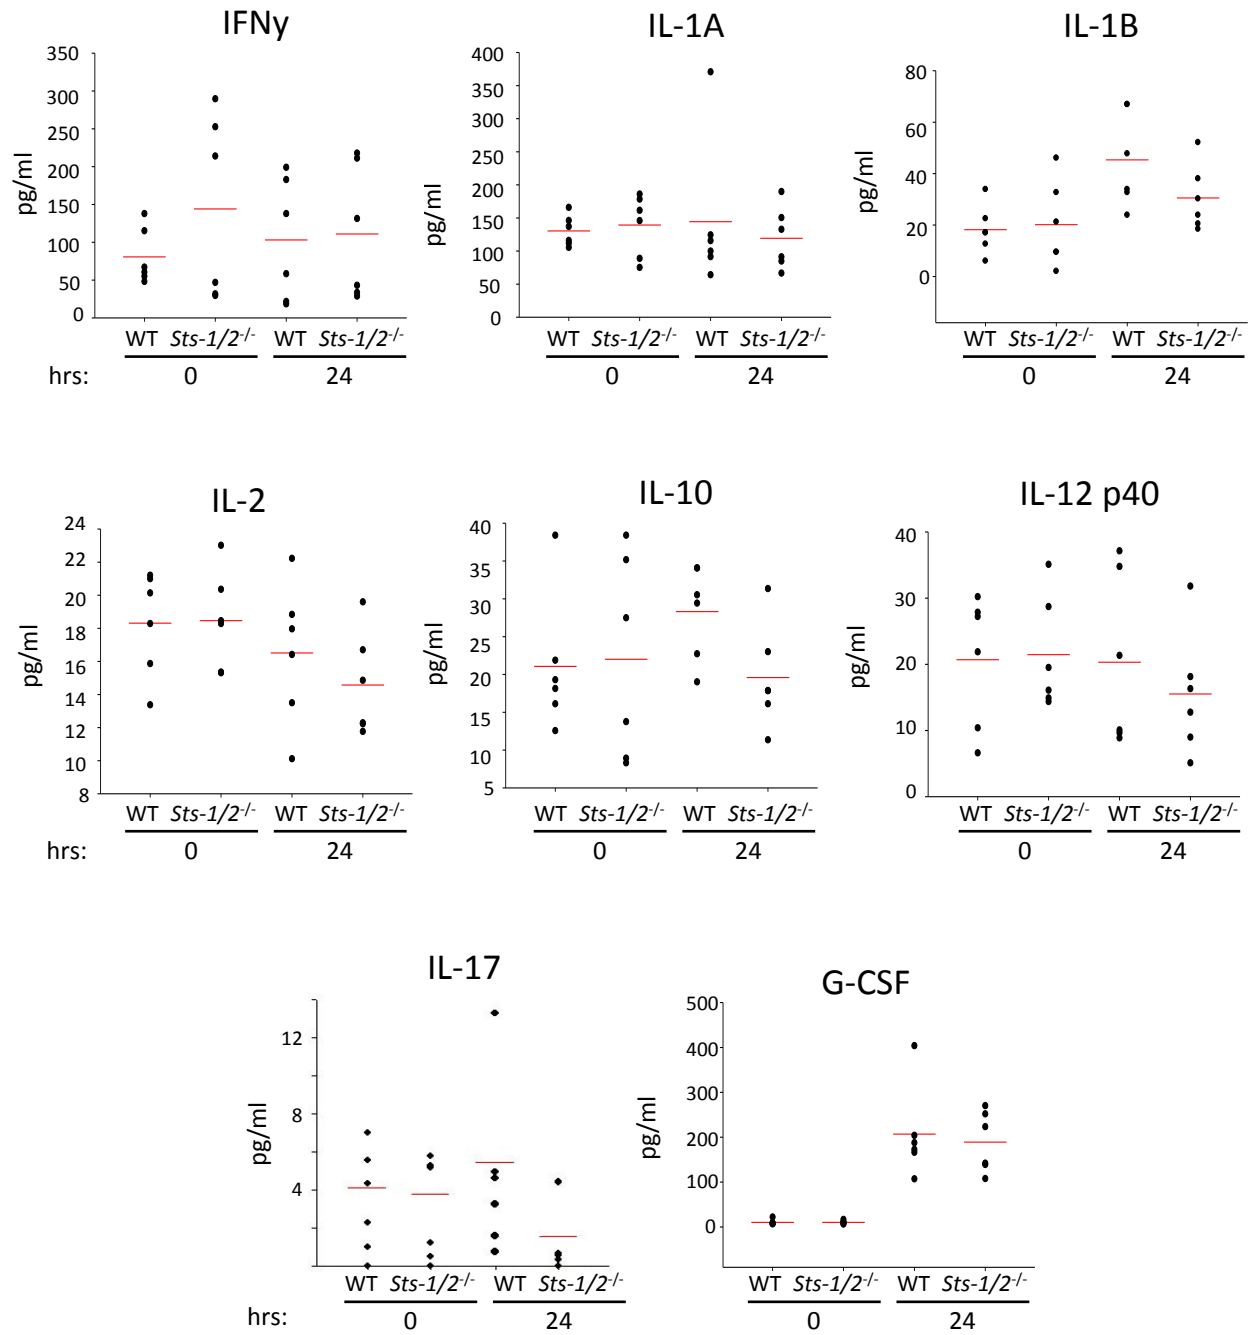

Supplement: IAI.02789-14_zii999091067so2.pdf [file IAI.02789-14_zii999091067so2.pdf]
